# Supplementary material
Source: ML conference proceedings conference paper supplement (https://openaccess.thecvf.com/content/WACV2025/html/Chokuwa_Divergent_Domains_Convergent_WACV_2025_paper.html)
Supplement: Supplementary file 1 [file Chokuwa_Divergent_Domains_Convergent_WACV_2025_supplemental.pdf]

# Supplementary Material — Divergent Domains, Convergent Grading: Enhancing Diabetic Retinopathy Grading Generalization

Sharon Chokuwa      Muhammad H. Khan  
Mohamed Bin Zayed University of Artificial Intelligence  
United Arab Emirates

{sharon.chokuwa, muhammad.haris}@mbzuai.ac.ae

## 1. Quantifying the Domain Shift

To further quantify the domain shift empirically, we calculated the Kullback-Leibler (KL) divergences among the domains. Subsequently, a heatmap detailing pairwise KL divergences among all domains was constructed, as presented in Fig. 1. Lighter shades on the heatmap indicate higher KL divergence, while darker shades signify lower KL divergence. The smallest domain shift is observed between the DDR [1] and IDRID [3] datasets, characterized by a KL divergence of 1.34, whereas the largest disparity is recorded between RLDR [5] and DeepDR [2], with a divergence of 4.93. This holistic analysis provides insights into the extent of domain shift observed between domains.

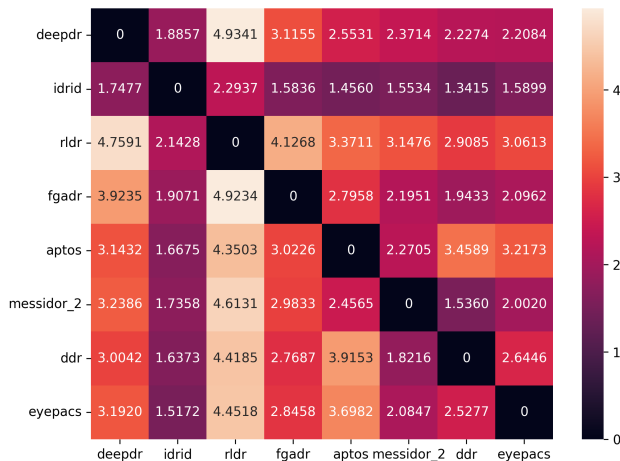

Figure 1. Heatmap visualization to show the KL divergences illustrating the extent of domain shift between domains. Lighter shades on the heatmap signify higher KL divergence, while darker shades indicate lower KL divergence.

## 2. Weighted Cross Entropy for DG

The weights for our weighted cross entropy are calculated as follows: For each domain  $S_d$ , the inverse class

weights are calculated as the ratio of total samples ( $m_d$ ) in  $S_d$  to the number of occurrences of each class  $y$  in that domain  $\omega_{yd} = \frac{m_d}{n_{yd}}$ . The inverse domain weights are calculated as the ratio of the total number of samples  $N$  to the number of samples in each domain  $\theta_d = \frac{N}{N_d}$ . The class weights are then normalized by dividing each weight by the maximum weight in that domain  $\hat{\omega}_{yd} = \frac{\omega_{yd}}{\max(\omega_{yd})}$ . The domain weights are normalized by dividing each weight by the maximum domain weight  $\hat{\theta}_d = \frac{\theta_d}{\max(\theta_d)}$ . Finally, the sample weights are calculated by multiplying the normalized class weights with the normalized domain weight for each class in each domain  $w_{yd} = \hat{\omega}_{yd} \times \hat{\theta}_d$ .

## 3. Dataset Proportions

The statistics of the datasets used for the SSL pretraining are presented in Tab. 1.

| Dataset               | Dataset Size |
|-----------------------|--------------|
| ORIGA                 | 650          |
| G1020                 | 1020         |
| ODIR-5K               | 8000         |
| Drishti-GS            | 101          |
| REFUGE                | 1200         |
| RFMiD                 | 1200         |
| DIARETDB1             | 89           |
| DRIONS-DB             | 110          |
| DRIVE                 | 40           |
| JSIEC                 | 997          |
| CHASE-DB1             | 28           |
| ROC                   | 100          |
| DR1 and DR2           | 2046         |
| cataract_dataset      | 601          |
| Fundus_Train_Val_Data | 650          |
| Total                 | 16832        |

Table 1. Detailed breakdown of the compositions of the retinal datasets utilized during the SSL pretraining phase.

For our DG model the datasets utilised are presented in

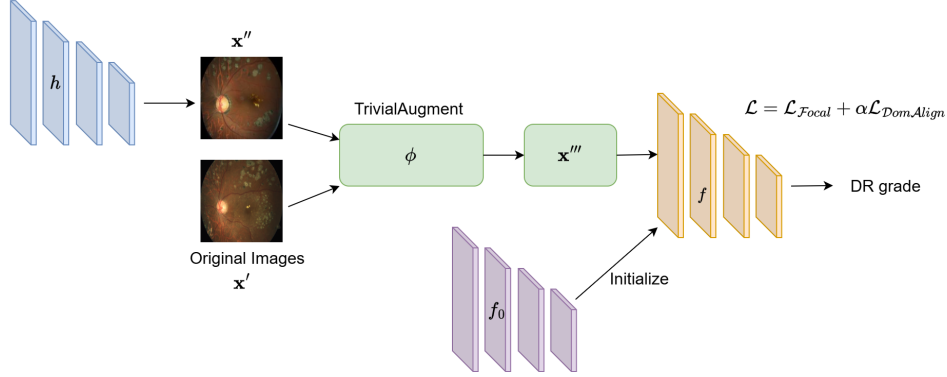

Figure 2. Overview of our method

Tab. 2, which illustrates the dataset sizes as well as geographic origins.

| Dataset    | Dataset size | Dataset origin               |
|------------|--------------|------------------------------|
| DeepDR     | 1600         | Different hospitals in China |
| Messidor-2 | 1744         | France                       |
| IDRID      | 516          | India                        |
| APTOS      | 3656         | Rural India                  |
| FGADR      | 1842         | UAE hospitals                |
| RLDR       | 1593         | USA                          |
| DDR        | 12497        | 23 provinces in China        |
| EyePACS    | 88698        | USA                          |

Table 2. OOD datasets sizes and origins used for our DG model.

#### 4. Additional Implementation Details Set-Up

**SSL pretraining:** We employ a batch size of 128. The model is trained for 200 epochs, utilizing a learning rate of 0.0003 and a weight decay of 1e-4.

**DR Augmentations:** Our Dreambooth utilized the hyperparameters outlined in Tab. 3. When Textual Inversion finetuning we utilize a training batch size of 1, a learning rate of 0.0005, and a maximum of 1000 training steps. Consistently, we employ the same instance and class prompts as employed in Dreambooth fine-tuning, maintaining a real guidance strength of 0.5, a Stable Diffusion guidance scale of 7.5, conducting 1000 denoising steps and 200 inference steps. Our code builds on [4] for generating the images.

**DG training and evaluation:** Tunable parameters  $\epsilon$ ,  $C$  and  $\alpha$  were experimentally chosen to be 0.1, 5 and 10, respectively. The batch size is configured as 128, with training conducted over 200 epochs (for our main results), employing a learning rate of 0.001 and SGD optimizer.

#### 5. Generative model finetuning data

*What implications arise from incorporating target data in finetuning the latent diffusion model?* To ensure that

| Hyperparameter          | Value                                 |
|-------------------------|---------------------------------------|
| Pretrained model        | CompVis/stable-diffusion-v1-4         |
| With prior preservation | True                                  |
| Prior loss weight       | 1.0                                   |
| Instance prompt         | 'a photo of fundus with <grade name>' |
| Class prompt            | 'a photo of fundus'                   |
| Resolution              | 512                                   |
| Train batch size        | 2                                     |
| Learning rate           | 5e-6                                  |
| Learning rate scheduler | constant                              |
| Max train steps         | 30000                                 |
| Number class images     | 500                                   |

Table 3. Finetuning Dreambooth hyperparameters and their values.

the datasets used in the OOD evaluations are distinct from the ones used in finetuning the latent diffusion model, only the EyePACS dataset was used for the latter purpose. This dataset was chosen due to its expansive size and rich variety of image representations across all grades, particularly grade 4 compared to the other domains, ensuring an ample size of samples for the fine-tuning process. We required approximately 200 images for training and 500 images as class images in each grade’s Dreambooth model. Our rationale for this approach was to ensure that there is no data leakage between the diffusion model and the DG model, since in a DG setting, we assume that the target data is completely unseen throughout the training process.

#### References

- [1] Tao Li, Yingqi Gao, Kai Wang, Song Guo, Hanruo Liu, and Hong Kang. Diagnostic assessment of deep learning algorithms for diabetic retinopathy screening. *Information Sciences*, 501:511 – 522, 2019. 1
- [2] Ruhan Liu, Xiangning Wang, Qiang Wu, Ling Dai, Xi Fang, Tao Yan, Jaemin Son, Shiqi Tang, Jiang Li, Zijian Gao, Adrian Galdran, J.M. Poorneshwaran, Hao Liu, Jie Wang, Yerui

Chen, Prasanna Porwal, Gavin Siew Wei Tan, Xiaokang Yang, Chao Dai, Haitao Song, Mingang Chen, Huating Li, Weiping Jia, Dinggang Shen, Bin Sheng, and Ping Zhang. Deepdrid: Diabetic retinopathy—grading and image quality estimation challenge. *Patterns*, page 100512, 2022. [1](#)

- [3] Prasanna Porwal, Samiksha Pachade, Ravi Kamble, Manesh Kokare, Girish Deshmukh, Vivek Sahasrabudde, and Fabrice Meriaudeau. Indian diabetic retinopathy image dataset (idrid), 2018. [1](#)
- [4] Brandon Trabucco, Kyle Doherty, Max Gurinas, and Ruslan Salakhutdinov. Effective data augmentation with diffusion models. *arXiv preprint arXiv:2302.07944*, 2023. [2](#)
- [5] Qijie Wei, Xirong Li, Weihong Yu, Xiao Zhang, Yongpeng Zhang, Bojie Hu, Bin Mo, Di Gong, Ning Chen, Dayong Ding, et al. Learn to segment retinal lesions and beyond. In *2020 25th International Conference on Pattern Recognition (ICPR)*, pages 7403–7410. IEEE, 2021. [1](#)
